# Supplementary material
Source: PubMed Central journal article supplement (PMC3420193)

# Supporting Information

Sheridan et al. 10.1073/pnas.1200041109

## SI Materials and Methods

**Preliminary Analysis of the Subsample Used.** To ensure that the subsample of participants who completed the MRI assessment was representative of the entire Bucharest Early Intervention Project (BEIP) sample, children who participated in the MRI assessment were compared with the children who did not participate within each of the three groups: care as usual group (CAUG), foster care group (FCG), never-institutionalized group (NIG). These groups were compared using a two-sample *t* test for differences in: age at this follow up visit, sex, full-scale intelligence quotient (IQ) at 8 y of age, internalizing and externalizing symptoms at 8 y, and  $\alpha$ -power. IQ was measured using the Wechsler intelligence scale for children (WISC-IV), internalizing symptoms were measured via caregiver report of each child's symptoms of anxiety or depressive disorders using a structured clinical interview for young children, the Preschool Age Psychiatric Assessment (1). Externalizing symptoms including symptoms of attention-deficit/hyperactivity disorder, oppositional defiant disorder, and conduct disorder were assessed using the same interview. No group differences were found for any of these variables, with the exception that children in the NIG who were included in the MRI study had significantly more externalizing symptoms than those who were not included in the MRI study,  $t(42) = 2.19$ ,  $P = 0.03$ , (MRI mean = 3.6 symptoms, SD = 3.33, no MRI mean = 1.2 symptoms, SD = 3.48). It may be that parents of children who were never institutionalized were slightly more likely to participate in this follow-up visit if they had some concerns about their child's well-being. (See Table S1 for a description of the sample). Overall, this analysis indicates that the participants in the MRI study are a representative subsample of the total sample of participants in the BEIP.

**Details on Randomization.** Initial randomization in the BEIP occurred for the 136 children residing in institutions at baseline and was performed by assigning each child a number from 1 to 136. Numbers were written on slips of paper and placed into a hat. The first number drawn from the hat was assigned to remain in the institution, the next was assigned to foster care, and so on, until all children had been assigned. Study design and methods of the BEIP have been described extensively elsewhere (2, 3).

**Details on Foster Care Intervention.** Because of a historical reliance on institutional care for abandoned children in Romania, foster care was almost nonexistent in Bucharest at the time the study began. As a result, we recruited and trained foster parents, using manuals developed by and for Romanians, to develop a network of 56 foster homes to care for 68 children randomized to foster care. BEIP foster parents received assistance from three project social workers who received initial training and weekly consultation from experienced mental health practitioners in the United States. The overall goal of the foster care intervention was to have foster parents make full psychological commitments to the children in their care. Through frequent and regular contacts, BEIP social workers carefully monitored the match between children and parents, encouraged child/parent attachment, made suggestions about managing common behavioral problems, and helped parents understand the special needs of formerly institutionalized children. Parents encouraged foster parents to develop a loving, committed relationship with their foster children. In fact, several foster parents decided to adopt the children they were fostering, even though this meant giving up a salary and becoming responsible for all future costs of the child. Stability of

placements was 87% from initial placement (children were 7–33 mo of age) through age 54 mo. At that point, the intervention ended and financial and administrative support of foster parents was assumed by the local government authorities in Bucharest.

**Details on FreeSurfer Analysis.** FreeSurfer processing includes motion correction of a volumetric T1-weighted image, removal of nonbrain tissue using a hybrid watershed/surface deformation procedure (4), automated Talairach transformation, previously validated in pediatric populations (5), and segmentation of the subcortical white matter and deep gray matter volumetric structures, separately validated for use with pediatric populations (6).

FreeSurfer provided 15 volume measurements. We collapsed across several of these measurements to reduce multiple comparisons, measurement error, and because we did not have specific hypotheses at the level of detail automatically provided by the FreeSurfer program. In total, we examined nine structural volumes, including: total brain volume, total cortical gray matter, total white matter, thalamus, hippocampus, amygdala, basal ganglia (caudate, putamen, nucleus accumbens, and pallidum), posterior corpus callosum (CC) (posterior and midposterior CC), middle CC, and anterior CC (anterior and midanterior CC). See Fig. S1 for volume in the CC by group. See Table S2 for volumes of each structure by group membership.

**Details on EEG Analysis.** Before applying the EEG cap, the scalp underlying each electrode site was gently abraded and electrolytic conducting gel was inserted between the scalp and electrode. Impedances were measured at each site and were kept below 10 k ohms. Channels were digitized at 512 Hz using a 12-bit A/D converter (+2.5 V range) and Snap-Master acquisition software (HEM Data).

One channel of vertical electrooculogram (EOG) was recorded from electrodes placed above and below the left eye to record blinks and eye movements. The EEG and EOG signals were amplified by factors of 5,000 and 2,500, respectively, using custom bioelectric amplifiers from SA Instrumentation. Amplifier filter settings for all channels were 0.1 Hz (high pass) and 100 Hz (low pass). Before the recording of EEG from each participant, a 50- $\mu$ V 10-Hz signal was input into each of the channels to and the amplified signal was recorded for calibration purposes.

**Details on the Mediation Analysis.** To test the significance of the mediation models, a nonparametric bootstrapping approach was used estimate the distribution of the change in the association of each predictor with the outcome after controlling for two mediators: total cortical gray matter and total white matter volume (5,000 bootstrap resamples) as described in Preacher and Hayes (7, 8; see also ref. 9). Generating this distribution allows the construction of a confidence interval from which the statistical significance of the indirect effect can be evaluated for each mediator separately. Confidence intervals that do not include zero indicate a significant indirect effect of the predictor on the outcome through the mediators. This approach has been recommended for use with small samples because it does not rely on assumptions of normality, which are often violated in small samples (8). Given the small sample size in this study for a mediation analysis, significance of mediation outcomes was assessed at a 90% confidence interval, making criteria for significance slightly more lenient.

**Alternative Data Analysis: Amygdala.** Studies have observed increased amygdala volume for children previously exposed to



**Fig. S2.** Average values for the ratio of amygdala/total brain volume for the three groups: CAUG, FCG, and NIG. Differences between the groups are not significant.

### Individual variation in volume by group

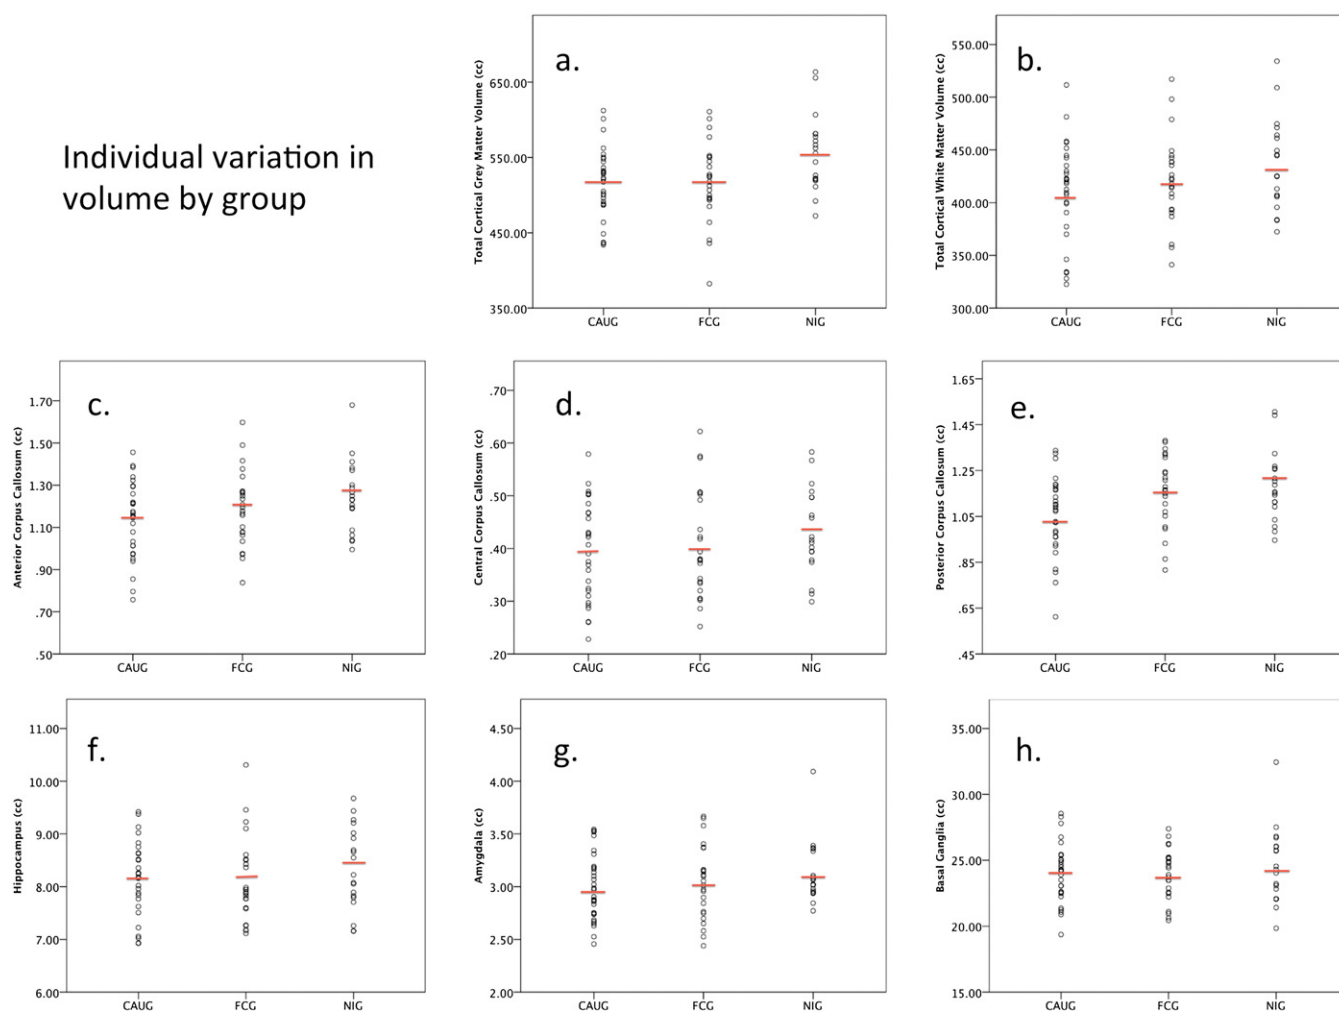

Supplement: 1200041109_pnas.201200041SI.pdf [file 1200041109_pnas.201200041SI.pdf]
